# Supplementary material
Source: PubMed Central journal article supplement (PMC6443228)
Supplement: jp8b11709_si_001.pdf [file jp8b11709_si_001.pdf]

## Supporting Information

# Interplay between Intra- and Inter-Molecular Charge Transfer in the Optical Excitations of J-aggregates

Michele Guerrini,<sup>1,2,3</sup> Caterina Cocchi,<sup>3\*</sup> Arrigo Calzolari,<sup>2</sup> Daniele Varsano,<sup>2\*</sup> and Stefano Corni<sup>2,4</sup>

<sup>1</sup>*Dipartimento FIM, Università di Modena e Reggio Emilia, Italy*

<sup>2</sup>*CNR Nano Istituto Nanoscienze, Centro S3, Modena, Italy*

<sup>3</sup>*Department of Physics and IRIS Adlershof, Humboldt-Universität zu Berlin, Berlin, Germany*

<sup>4</sup>*Dipartimento di Scienze Chimiche, Università di Padova, Italy*

**Corresponding Authors:** caterina.cocchi@physik.hu-berlin.de, daniele.varsano@nano.cnr.it

Section 1 – Additional information about the electronic and optical properties of the isolated push-pull monomer

**Table S1** - HOMO-LUMO gap of the isolated push-pull monomer computed with different approximations for the exchange-correlation functionals as starting points for GW calculations ( $G_0W_0$  and self-consistent on the eigenvalues only *ev-GW*). Calculations performed on relaxed geometry (cc-pVTZ basis set, force minimization threshold  $10^{-4}$  Hartree /Bohr).

| Starting point | DFT     | $G_0W_0$ | ev-GW   |
|----------------|---------|----------|---------|
| HARTREE-FOCK   | 8.42 eV | 7.10 eV  | 6.91 eV |
| CAM-B3LYP      | 5.57 eV | 6.46 eV  | 6.59 eV |
| B3LYP          | 3.25 eV | 5.89 eV  | 6.44 eV |
| PBE0           | 3.56 eV | 5.98 eV  | 6.47 eV |
| <u>PBE</u>     | 2.05 eV | 5.19 eV  | 6.40 eV |

**Table S2** Comparison between the HOMO-LUMO gap of the monomer calculated from DFT with localized basis set using MOLGW and with plane-waves using the Quantum Espresso code. Calculations referred to the non-relaxed monomer geometry extracted from bulk J-aggregate.

| <i>Code + convergence parameters</i>                                                                                                                                                                                                                                                                                                                                                           | <i>DFT gap</i> |
|------------------------------------------------------------------------------------------------------------------------------------------------------------------------------------------------------------------------------------------------------------------------------------------------------------------------------------------------------------------------------------------------|----------------|
| <i>MOLGW (cc-pVTZ, PBE, all electrons, <math>10^{-8}</math> Ry energy convergence accuracy)</i>                                                                                                                                                                                                                                                                                                | 1.70 eV        |
| <i>QUANTUM ESPRESSO (plane waves cut-off 60 Ry, PBE, optimized norm-conserving pseudopotentials, <math>10^{-8}</math> Ry energy convergence accuracy).<br/>Supercell type: orthorhombic (<math>a=18 \text{ \AA}</math>, <math>b=18 \text{ \AA}</math>, <math>c=29 \text{ \AA}</math>)<br/>Vacuum layer of <math>20 \text{ \AA}</math> to avoid spurious interactions between the replicas.</i> | 1.67 eV        |

**Table S3** – Energy and composition of the first five excited state of the push-pull monomer  $C_{24}H_{19}F_4N$ , including the excitation energy and the weight given by the square of the normalized BSE coefficients. Only weights contributing more than 10% are reported. Calculations are performed on the non-relaxed geometry using the MOLGW code and the PBE functional as starting point for ev-GW calculations.

| <b>Excited state energy (eV)</b> | <b>Occupied level</b> | <b>Unoccupied level</b> | <b>Weight <math> A_{cv}^\lambda ^2</math></b> | <b>Oscillator strength</b> |
|----------------------------------|-----------------------|-------------------------|-----------------------------------------------|----------------------------|
| $E^{M1} = 3.39$                  | HOMO                  | LUMO                    | 0.83                                          | 3.50                       |
| $E^{M2} = 4.12$                  | HOMO                  | LUMO+3                  | 0.73                                          | 0.08                       |
| $E^{M3} = 4.39$                  | HOMO-4                | LUMO                    | 0.16                                          | 0.09                       |
|                                  | HOMO-1                | LUMO                    | 0.30                                          |                            |
|                                  | HOMO                  | LUMO+1                  | 0.12                                          |                            |
|                                  | HOMO                  | LUMO+2                  | 0.13                                          |                            |
| $E^{M4} = 4.45$                  | HOMO-4                | LUMO                    | 0.21                                          | 0.30                       |
|                                  | HOMO-1                | LUMO                    | 0.42                                          |                            |
|                                  | HOMO                  | LUMO+2                  | 0.21                                          |                            |
| $E^{M5} = 4.56$                  | HOMO-2                | LUMO                    | 0.63                                          | 0.04                       |
|                                  | HOMO-2                | LUMO+1                  | 0.13                                          |                            |
| $E^{M6} = 4.62$                  | HOMO-1                | LUMO                    | 0.11                                          | 0.04                       |
|                                  | HOMO                  | LUMO+1                  | 0.59                                          |                            |

**Table S4** – Energy and composition of the first five excited state of the push-pull monomer  $C_{24}H_{19}F_4N$ , including the excitation energy and the weight given by the square of the normalized BSE coefficients. Only weights contributing more than 10% are reported. Calculations are performed on the relaxed geometry using the MOLGW code and the PBE functional as starting point for *ev*-GW calculations.

| Excited state energy (eV) | Occupied level                     | Unoccupied level                 | Weight $ A_{cv}^\lambda ^2$  | Oscillator strength |
|---------------------------|------------------------------------|----------------------------------|------------------------------|---------------------|
| $E^M = 3.85$              | HOMO                               | LUMO                             | 0.76                         | 3.36                |
| $E^{M2} = 4.43$           | HOMO                               | LUMO+3                           | 0.64                         | 0.02                |
| $E^{M3} = 4.52$           | HOMO-2<br>HOMO-2                   | LUMO<br>LUMO+1                   | 0.64<br>0.15                 | 0.05                |
| $E^{M4} = 4.63$           | HOMO-5<br>HOMO-1<br>HOMO-1<br>HOMO | LUMO<br>LUMO<br>LUMO+2<br>LUMO+1 | 0.21<br>0.25<br>0.10<br>0.19 | 0.08                |
| $E^{M5} = 4.68$           | HOMO-5<br>HOMO-1                   | LUMO<br>LUMO                     | 0.20<br>0.46                 | 0.20                |
| $E^{M6} = 5.00$           | HOMO<br>HOMO                       | LUMO<br>LUMO+1                   | 0.10<br>0.49                 | 0.08                |

**Table S5** – Energy and composition of the first five excited state of the push-pull monomer  $C_{24}H_{19}F_4N$ , including the excitation energy and the weight given by the square of the normalized BSE coefficients. Only weights contributing more than 10% are reported. Calculations are performed on the relaxed geometry using the MOLGW code and the CAM-B3LYP functional as starting point for *ev*-GW calculations.

| Excited state energy (eV) | Occupied level           | Unoccupied level       | Weight $ A_{cv}^\lambda ^2$ | Oscillator strength |
|---------------------------|--------------------------|------------------------|-----------------------------|---------------------|
| $E^M = 3.73$              | HOMO                     | LUMO                   | 0.768                       | 2.44                |
| $E^{M2} = 4.50$           | HOMO<br>HOMO             | LUMO+2<br>LUMO+3       | 0.12<br>0.39                | 0.001               |
| $E^{M3} = 4.58$           | HOMO-5<br>HOMO-2<br>HOMO | LUMO<br>LUMO<br>LUMO+3 | 0.13<br>0.18<br>0.19        | 0.05                |
| $E^{M4} = 4.60$           | HOMO-2<br>HOMO-2         | LUMO<br>LUMO+1         | 0.39<br>0.12                | 0.01                |
| $E^{M5} = 4.70$           | HOMO-5<br>HOMO-1<br>HOMO | LUMO<br>LUMO<br>LUMO+1 | 0.11<br>0.44<br>0.15        | 0.05                |
| $E^{M5} = 5.16$           | HOMO-1<br>HOMO<br>HOMO   | LUMO<br>LUMO<br>LUMO+1 | 0.20<br>0.12<br>0.41        | 0.15                |

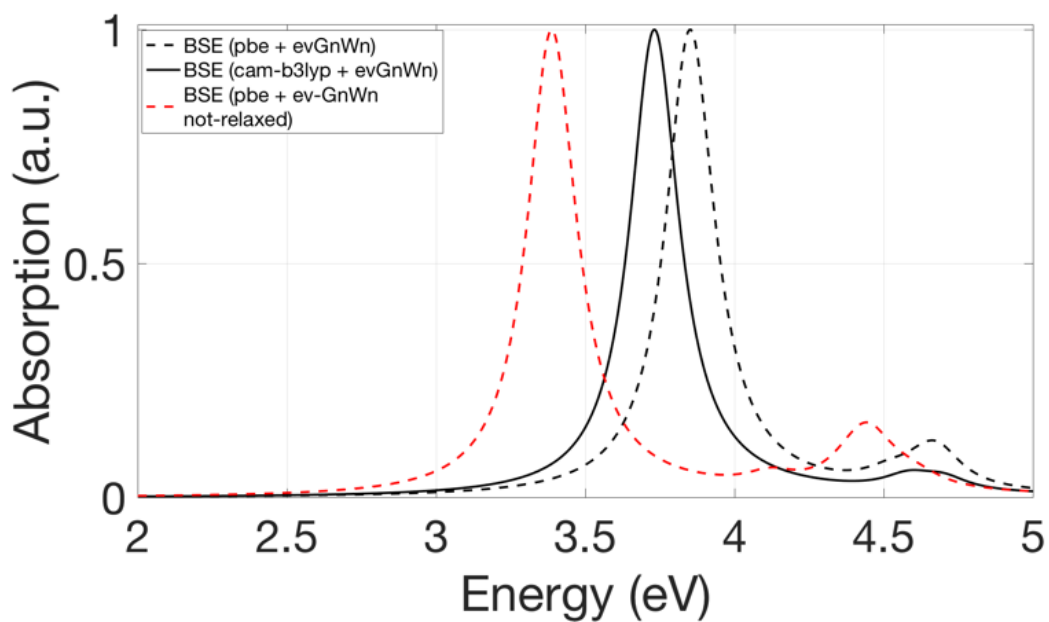

Figure S1 – BSE absorption spectra of the push-pull dye  $C_{24}H_{19}F_4N$  obtained using two different xc-starting point functionals as starting point for ev-GW calculations: PBE (dashed line) and CAM-B3LYP (solid line). Calculations performed with the MOLGW cc-pVTZ basis in the Tamm-Dancoff approximation on the non-relaxed geometry in red and on the relaxed geometry in black.

Section 2 –Additional information about the electronic and optical properties of the J-aggregate

**Table S6** - DFT and GW gaps for the J-aggregate.  $G_0W_0$  is perturbative GW;  $ev-G_nW_0$  is eigenvalues-only self-consistent GW where in each cycle one updates the energy eigenvalues only in the Green's function  $G$  while maintaining the screening  $W_0$  as in the  $G_0W_0$  first step;  $ev-G_nW_n$  updates at each cycle the energy eigenvalues in both the Green's function  $G$  and the screening  $W$

| DFT (PBE) | $G_0W_0$ | $ev-G_nW_0$ | $ev-G_nW_n$ |
|-----------|----------|-------------|-------------|
| 1.47 eV   | 3.21 eV  | 3.37 eV     | 3.37 eV     |

**Table S7** - Energy and composition of the J and  $J_{CT}$  excitations of the J-aggregate, including the excitation energy, the  $\mathbf{k}$ -point at which the transition take place expressed in reciprocal crystal units (rcu), and the weight given by the square of the normalized BSE coefficients. Only weights larger than 2% are reported.

| Excited state energy (eV) | Occupied band | Unoccupied band | $\mathbf{k}$ -point (rcu) | $\epsilon_{ck}^{QP} - \epsilon_{vk}^{QP}$ (eV) | Weight $10 \times  A_{cvk}^\lambda ^2$ |
|---------------------------|---------------|-----------------|---------------------------|------------------------------------------------|----------------------------------------|
| $E^{J^1} = 2.786$         | VBM           | CBm             | (-0.4, 0, 0)              | 3.21                                           | 0.75                                   |
|                           | VBM           | CBm             | (0.4, 0, 0)               | 3.21                                           | 0.72                                   |
|                           | VBM           | CBm             | (0.4, 0, -0.5)            | 3.22                                           | 0.66                                   |
|                           | VBM           | CBm             | (-0.4, 0, 0.5)            | 3.22                                           | 0.64                                   |
|                           | VBM-1         | CBm+1           | (-0.4, 0, 0.5)            | 3.23                                           | 0.64                                   |
|                           | VBM-1         | CBm+1           | (0.4, 0, -0.5)            | 3.23                                           | 0.58                                   |
|                           | VBM-1         | CBm+1           | (-0.4, 0, 0)              | 3.24                                           | 0.54                                   |
|                           | VBM-1         | CBm+1           | (0.4, 0, 0)               | 3.24                                           | 0.53                                   |
| $E^{J^3} = 2.813$         | VBM-2         | CBm+1           | (-0.4, 0, 0)              | 3.33                                           | 0.24                                   |
|                           | VBM-2         | CBm+1           | (-0.4, 0, 0.5)            | 3.34                                           | 0.24                                   |
|                           | VBM-2         | CBm+1           | (0.4, 0, 0)               | 3.33                                           | 0.23                                   |
|                           | VBM-3         | CBm             | (-0.4, 0, 0)              | 3.35                                           | 0.22                                   |
|                           | VBM-3         | CBm             | (0.4, 0, -0.5)            | 3.34                                           | 0.22                                   |
|                           | VBM-3         | CBm             | (-0.4, 0, 0.5)            | 3.34                                           | 0.22                                   |
|                           | VBM-2         | CBm+1           | (0.4, 0, -0.5)            | 3.34                                           | 0.21                                   |
|                           | VBM-3         | CBm             | (0.4, 0, 0)               | 3.35                                           | 0.21                                   |
| $E^{J^5} = 2.903$         | VBM           | CBm             | (-0.4, 0, 0)              | 3.21                                           | 0.66                                   |
|                           | VBM           | CBm             | (-0.2, 0, 0)              | 3.27                                           | 0.53                                   |
|                           | VBM           | CBm             | (-0.2, 0, 0.5)            | 3.28                                           | 0.49                                   |
|                           | VBM           | CBm             | (-0.4, 0, 0.5)            | 3.22                                           | 0.45                                   |
|                           | VBM           | CBm             | (0.4, 0.333, -0.5)        | 3.31                                           | 0.38                                   |
|                           | VBM-1         | CBm+1           | (0.4, -0.333, -0.5)       | 3.32                                           | 0.38                                   |
|                           | VBM-1         | CBm+1           | (-0.4, 0, 0.5)            | 3.23                                           | 0.37                                   |
|                           | VBM           | CBm             | (0.4, 0.333, 0)           | 3.31                                           | 0.33                                   |
|                           | VBM-1         | CBm+1           | (0.4, -0.333, 0)          | 3.32                                           | 0.32                                   |
|                           | VBM-1         | CBm+1           | (-0.2, 0, 0.5)            | 3.30                                           | 0.26                                   |
|                           | VBM-1         | CBm+1           | (-0.2, 0, 0)              | 3.32                                           | 0.24                                   |
|                           | VBM-1         | CBm+1           | (-0.4, 0, 0)              | 3.24                                           | 0.21                                   |

|                     |       |       |                    |      |      |
|---------------------|-------|-------|--------------------|------|------|
|                     | VBM   | CBm   | (0.4, -0.333, 0)   | 3.31 | 0.21 |
|                     | VBM-1 | CBm+1 | (-0.4, 0.333, 0.5) | 3.32 | 0.21 |
|                     | VBM-1 | CBm+1 | (0.4, 0.333, 0)    | 3.32 | 0.21 |
|                     | VBM   | CBm   | (-0.4, -0.33, 0.5) | 3.31 | 0.21 |
| $E^{J_{18}} = 3.03$ | VBM   | CBm+1 | (0.4, 0, 0)        | 3.22 | 0.76 |
|                     | VBM   | CBm+1 | (-0.4, 0, 0)       | 3.22 | 0.68 |
|                     | VBM   | CBm+1 | (-0.2, 0, 0.5)     | 3.29 | 0.64 |
|                     | VBM   | CBm+1 | (0.2, 0, -0.5)     | 3.29 | 0.63 |
|                     | VBM-1 | CBm   | (0, 0, 0)          | 3.37 | 0.33 |
|                     | VBM-1 | CBm   | (0.4, 0, -0.5)     | 3.23 | 0.22 |
|                     | VBM-2 | CBm   | (-0.2, 0, 0)       | 3.34 | 0.21 |
|                     | VBM   | CBm+1 | (0, 0, -0.5)       | 3.37 | 0.20 |

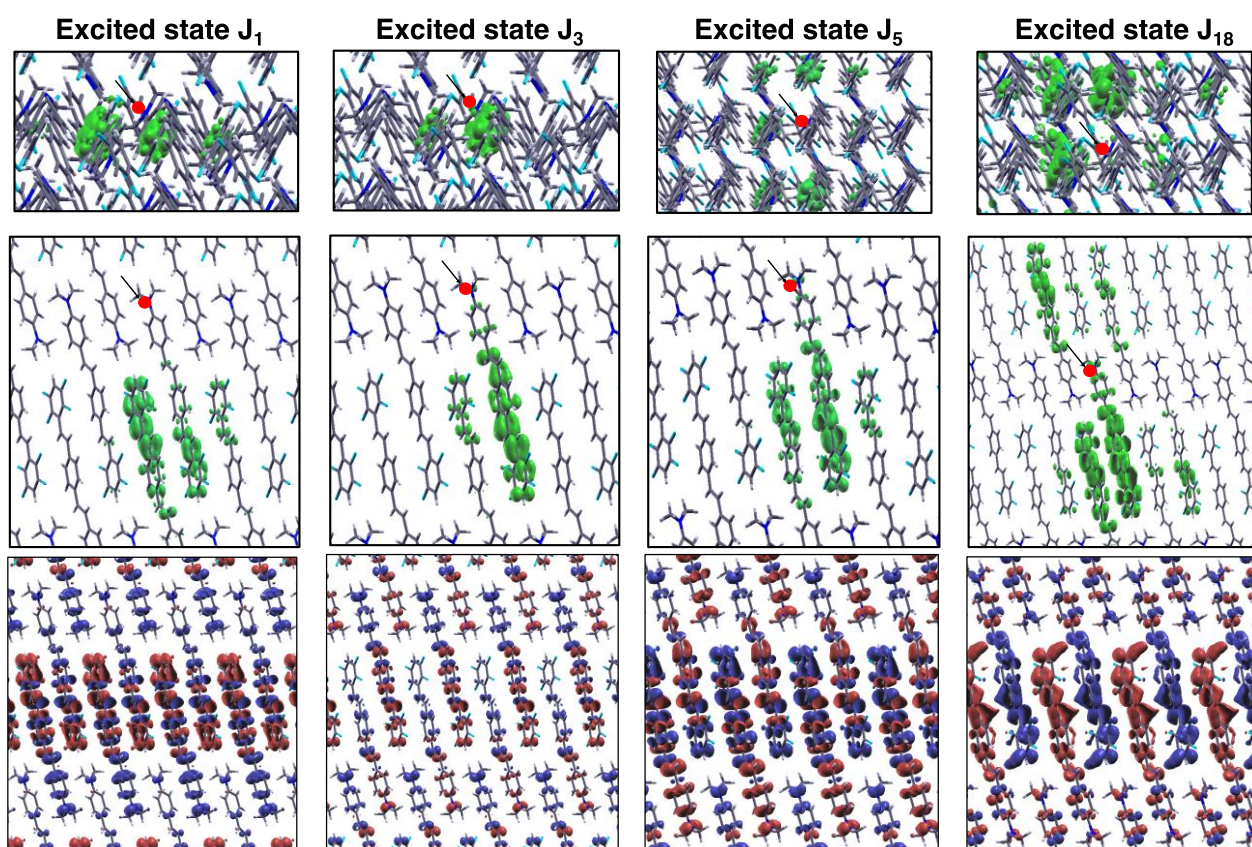

Figure S2 – Exciton probability densities with fixed hole position marked by the red dot (upper panels) and transition densities (lower panels) of the four excited states of J-aggregate, reported in Table S7. Isosurfaces fixed at 10% of the maximum value.
